# Supplementary material for: Nanohybrid layered double hydroxide materials as efficient catalysts for methanol electrooxidation
Source: Royal Society of Chemistry journal article supplement (doi:10.1039/c9ra01270b), 2019-01-01
Supplement: c9ra01270b1.pdf [file c9ra01270b1.pdf]

## Supporting materials

### **Nanohybrid layered double hydroxides materials as efficient catalysts for methanol electrooxidation**

Shimaa Gamil<sup>1</sup>, Waleed M. A. El Rouby<sup>2\*</sup>, Manuel Antuch<sup>3</sup>, I.T. Zedan<sup>1</sup>

<sup>1</sup> Renewable Energy Science and Engineering Department, Faculty of Postgraduate Studies for Advanced Science, Beni-Suef University, 62511 Beni-Suef, Egypt.

<sup>2</sup> Materials Science and Nanotechnology Department, Faculty of Postgraduate Studies for Advanced Science, Beni-Suef University, 62511 Beni-Suef, Egypt.

<sup>3</sup> Paris-Sud University, ICMMO-Eriée, UMR CNRS 8182, 91405 Orsay, France.

\* Corresponding author e-mail: [waleedmohamedali@psas.bsu.edu.eg](mailto:waleedmohamedali@psas.bsu.edu.eg)

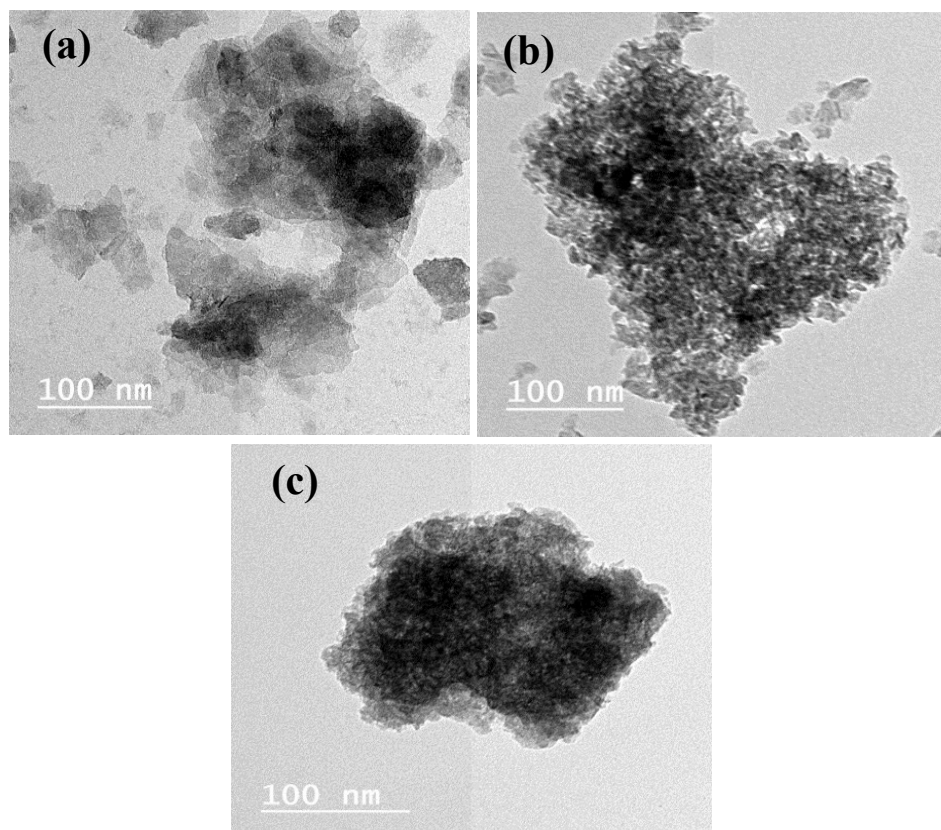

**Fig. S1;** TEM images of hybrid (a) NiCr- LDH, (b) CoCr- LDH and (c) NiCoCr- LDH

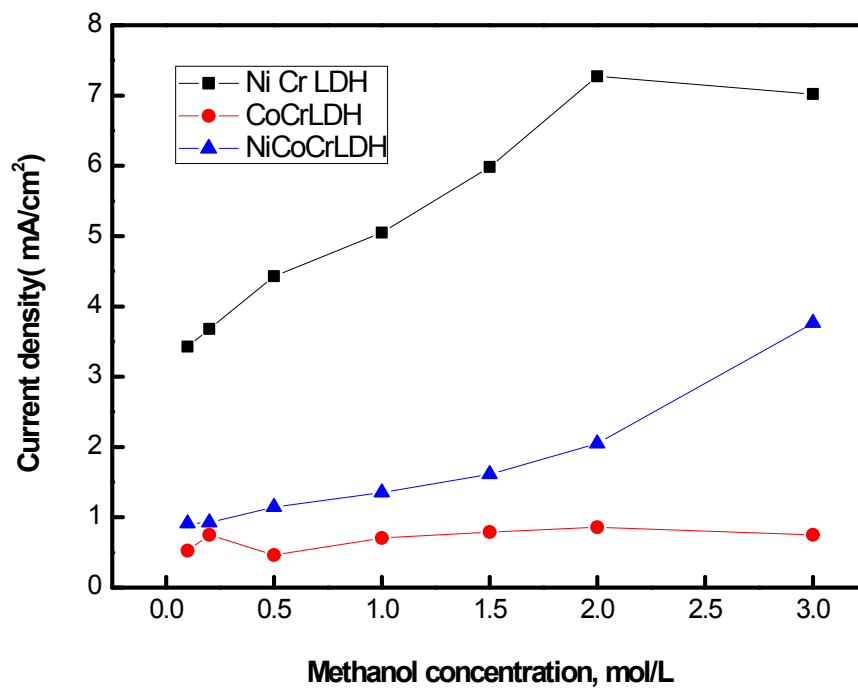

**Fig. S2;** Variation of current density with different methanol concentrations for Ni Cr-LDH, Co Cr-LDH and Ni Co Cr-LDH

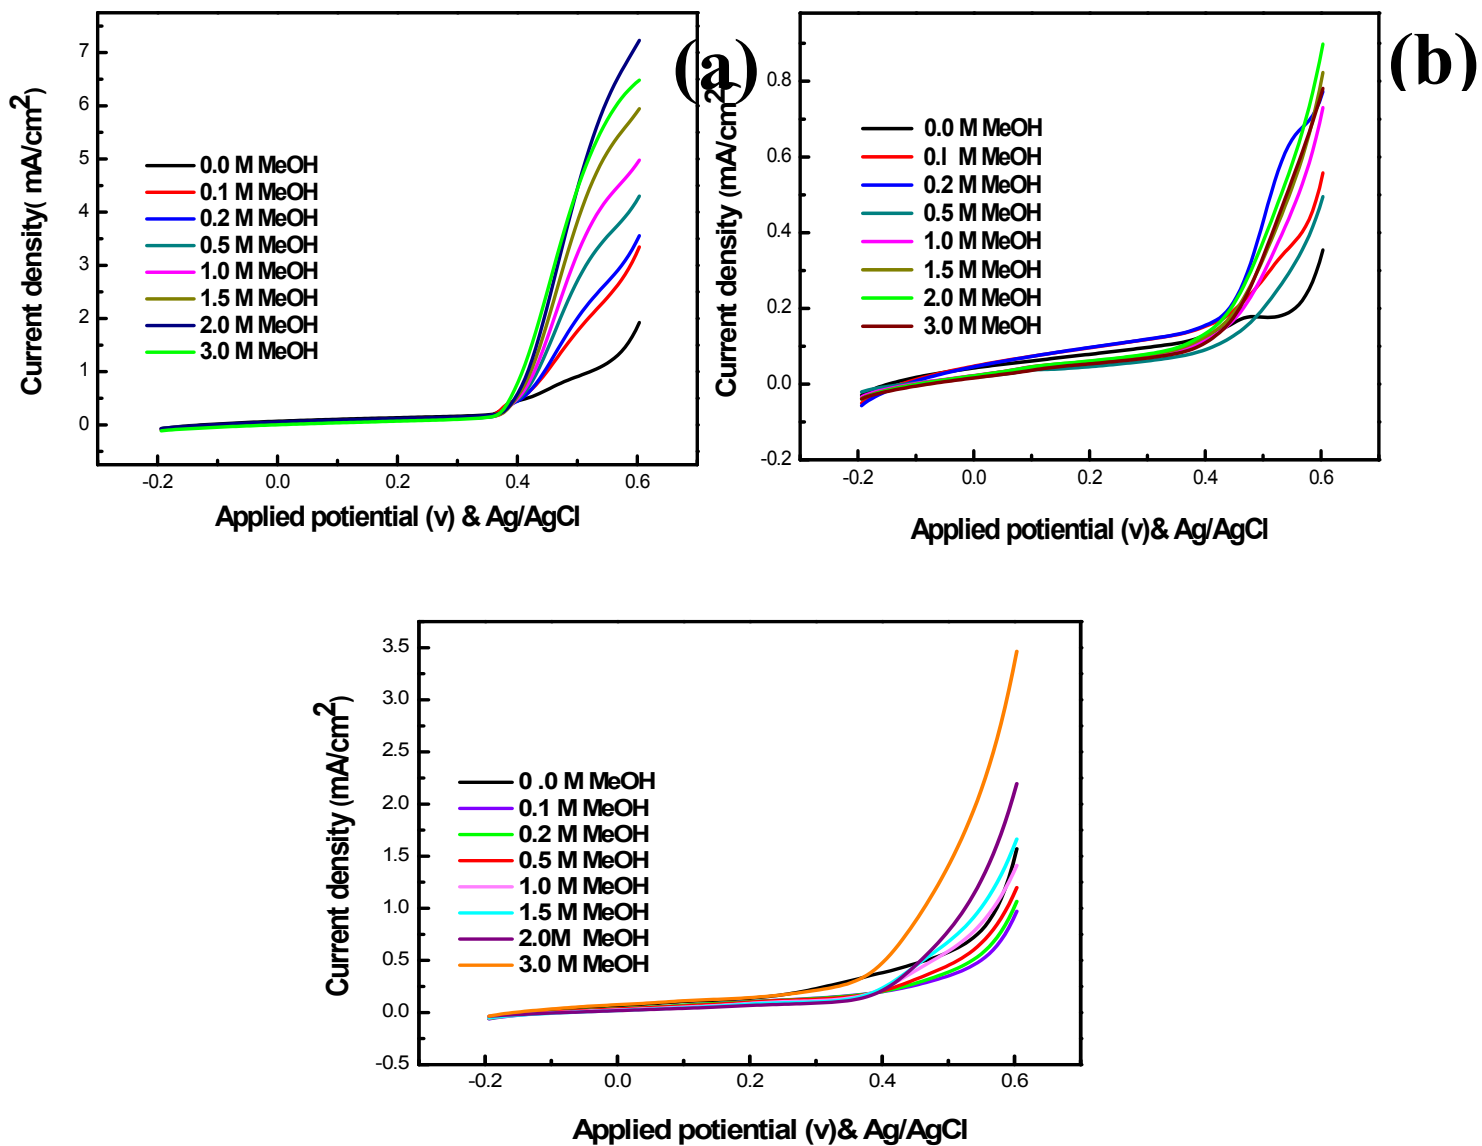

**Fig.S3;** The onset potentials for the hybrids (a) NiCr- LDH and (b) CoCr-LDH (c) NiCoCr- LDH with different methanol concentrations, at 60 Mvs<sup>-1</sup> scan rate.

Table S1. Fitting results of the Impedance Spectra. Resistances are expressed in

| <b>NiCr-LDH</b> |                 |                  |                  |                 |                |                |
|-----------------|-----------------|------------------|------------------|-----------------|----------------|----------------|
| c(MeOH)         | R <sub>CT</sub> | R <sub>ads</sub> | Q <sub>ads</sub> | Q <sub>dl</sub> | n <sub>1</sub> | n <sub>2</sub> |
| 0               | 3.00E+02        | 1.02E+02         | 3.99E-04         | 2.50E-05        | 0.85           | 0.85           |
| 0.1             | 3.38E+02        | 1.31E+02         | 2.78E-04         | 2.27E-05        | 0.85           | 0.85           |
| 0.2             | 3.99E+02        | 1.29E+02         | 2.17E-04         | 2.22E-05        | 0.85           | 0.85           |
| 0.5             | 6.15E+02        | 1.18E+02         | 9.00E-04         | 2.41E-05        | 0.85           | 0.85           |
| 1               | 9.20E+02        | 2.76E+02         | 7.02E-04         | 2.40E-05        | 0.85           | 0.85           |
| 1.5             | 1.66E+03        | 1.44E+03         | 4.75E-04         | 2.74E-05        | 0.85           | 0.85           |
| 2               | 1.44E+03        | 1.46E+03         | 6.63E-04         | 2.88E-05        | 0.85           | 0.85           |
| 3               | 1.42E+02        | -1.7E+03         | 1.03E-03         | 2.94E-05        | 0.80           | 0.95           |

| <b>CoCr-LDH</b> |                 |                  |                  |                 |                |                |
|-----------------|-----------------|------------------|------------------|-----------------|----------------|----------------|
| c(MeOH)         | R <sub>CT</sub> | R <sub>ads</sub> | Q <sub>ads</sub> | Q <sub>dl</sub> | n <sub>1</sub> | n <sub>2</sub> |
| 0               | 1.31E+03        | 3.14E+02         | 2.00E-04         | 1.37E-05        | 0.86           | 0.85           |
| 0.1             | 1.32E+03        | 2.63E+02         | 3.43E-04         | 1.43E-05        | 0.86           | 0.85           |
| 0.2             | 1.59E+03        | 4.29E+02         | 4.93E-04         | 1.53E-05        | 0.85           | 0.85           |
| 0.5             | 3.20E+03        | 6.31E+02         | 1.67E-04         | 2.64E-05        | 0.80           | 0.80           |
| 1               | 2.67E+03        | 5.46E+02         | 2.52E-04         | 2.71E-05        | 0.80           | 0.80           |
| 1.5             | 2.76E+03        | 4.17E+02         | 4.99E-04         | 2.71E-05        | 0.80           | 0.80           |
| 2               | 2.71E+03        | 5.00E+02         | 3.17E-04         | 2.57E-05        | 0.80           | 0.80           |
| 3               | 4.98E+03        | 5.44E+02         | 2.45E-03         | 2.46E-05        | 0.80           | 0.80           |

| <b>NiCoCr-LDH</b> |                 |                  |                  |                 |                |                |
|-------------------|-----------------|------------------|------------------|-----------------|----------------|----------------|
| c(MeOH)           | R <sub>CT</sub> | R <sub>ads</sub> | Q <sub>ads</sub> | Q <sub>dl</sub> | n <sub>1</sub> | n <sub>2</sub> |
| 0                 | 3.94E+02        | 1.76E+01         | 1.00E-04         | 8.72E-05        | 0.86           | 0.98           |
| 0.1               | 1.04E+03        | 5.70E+01         | 1.62E-03         | 3.23E-05        | 0.80           | 0.82           |
| 0.2               | 1.14E+03        | 3.72E+01         | 1.35E-03         | 2.87E-05        | 0.80           | 0.81           |
| 0.5               | 1.27E+03        | 3.89E+01         | 1.01E-04         | 2.36E-05        | 0.81           | 1.00           |
| 1                 | 1.45E+03        | 2.35E+01         | 1.99E-04         | 1.98E-05        | 0.83           | 1.00           |
| 1.5               | 1.49E+03        | 5.09E+01         | 3.00E-03         | 1.78E-05        | 0.86           | 0.80           |
| 2                 | 1.44E+03        | 5.60E+01         | 1.76E-03         | 1.79E-05        | 0.88           | 0.80           |
| 3                 | 5.27E+02        | 9.68E+01         | 1.00E-04         | 5.56E-05        | 0.86           | 1.00           |

Ohms, while Q has units of F/s<sup>(1-n)</sup>cm<sup>2</sup> where n is the CPE exponent.

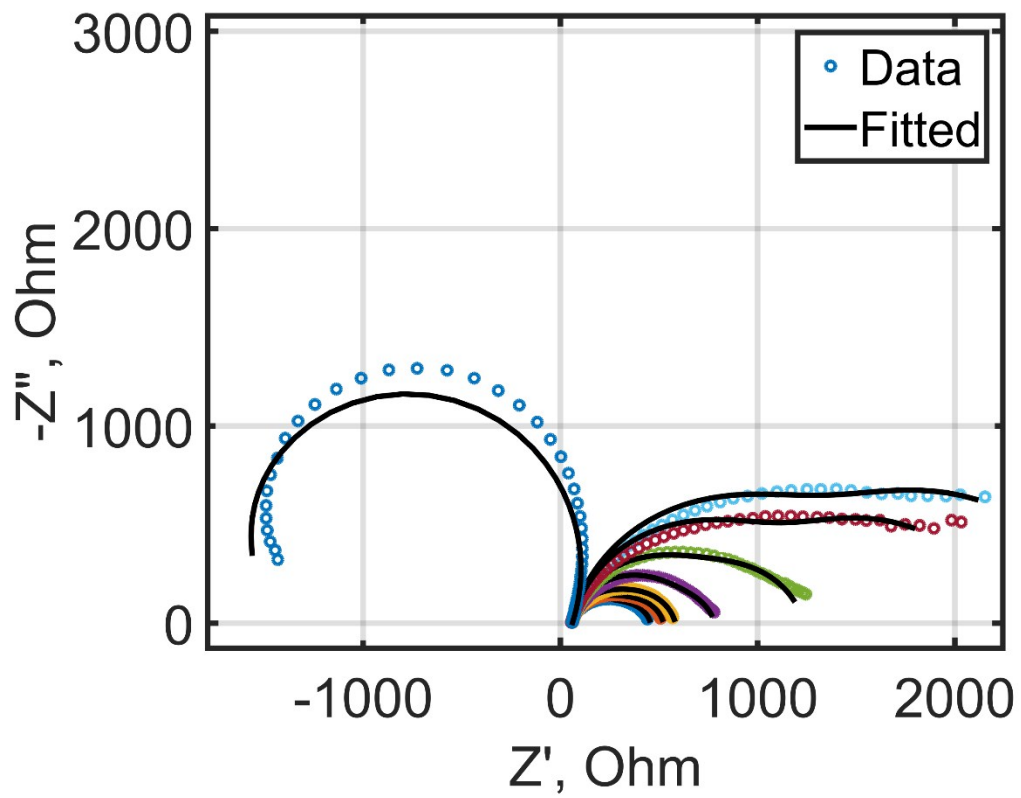

**Fig. S4;** EIS LDH NiCr the for fits and data material

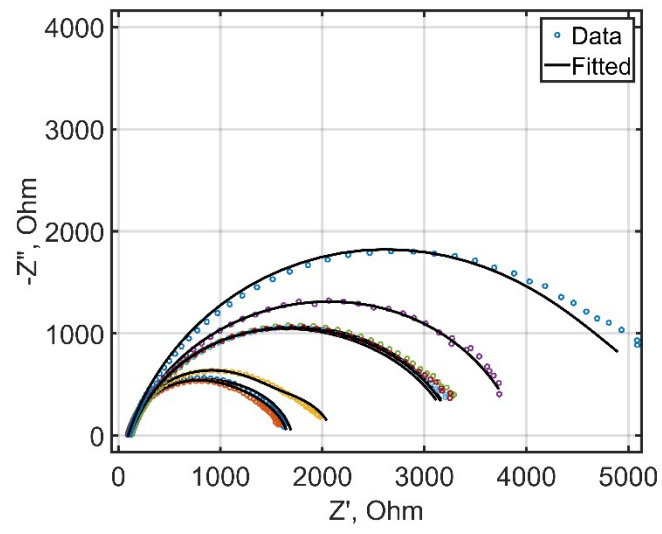

**Fig. S5;** LDH CoCr the for fit and data EIS material

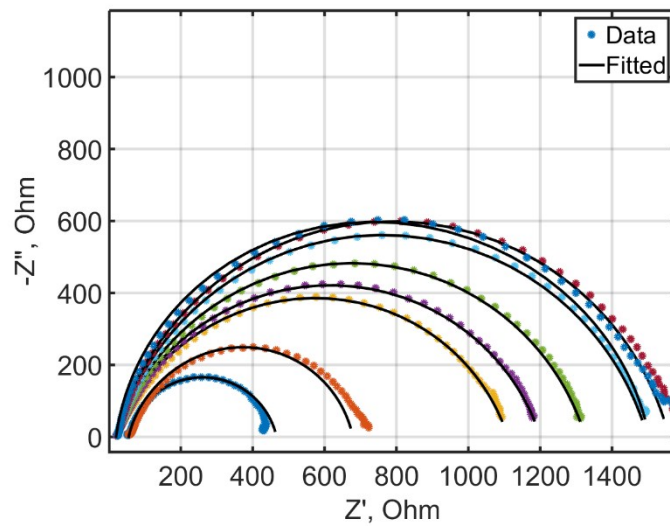

**Fig. S6;**material LDH NiCoCr the for fits and data EIS
